# Supplementary material for: Multi-photon upconversion luminescence from a CaxYF3+2x host by doping with Yb3+/Er3+ or Yb3+/Tm3+
Source: Royal Society of Chemistry journal article supplement (doi:10.1039/c3ra43702g), 2013-01-01
Supplement: c3ra43702g.pdf [file c3ra43702g.pdf]

## Electronic Supplementary Information

### Multi-photon upconversion luminescence from $\text{Ca}_x\text{YF}_{3+2x}$ host by doping $\text{Yb}^{3+}/\text{Er}^{3+}$ or $\text{Yb}^{3+}/\text{Tm}^{3+}$ †

Bao-Li An\*, Li-Hua Ma, Jian-Hui Fang, Yu-Qin Wang, Jia-Qiang Xu \*

Department of Chemistry, College of Science, Shanghai University, Shanghai 200444, China.

#### Experimental details

**Materials.** Rare earth oxides  $\text{Y}_2\text{O}_3$  (99.99%),  $\text{Yb}_2\text{O}_3$  (99.99%),  $\text{Er}_2\text{O}_3$  (99.99%), and  $\text{Ca}(\text{OH})_2$  (95%) were purchased from Sinopharm Chemical Reagent Company and used as received.

**Synthesis of the Upconversion(UC) materials.** Rare earth nitrates  $\text{Y}(\text{NO}_3)_3$ ,  $\text{Yb}(\text{NO}_3)_3$ ,  $\text{Er}(\text{NO}_3)_3$ , and  $\text{Tm}(\text{NO}_3)_3$  were prepared by dissolving the rare earth oxides in nitric acid. The UC materials were prepared by hydrothermal synthesis strategy. Rare earth nitrate ( $\text{RE}(\text{NO}_3)_3$ , RE: 78 mol% Y, 20 mol% Yb, 2 mol% Er ) aqueous solution were mixed together at 60-70 °C under agitation. 0.2 g CTAB, proper amount of  $\text{Ca}(\text{OH})_2$  and 1 ml octanol were mixed in water solution under thorough stirring, then this mixture was dropwisely added to the rare earth nitrate solution. A homogeneous microemulsion might be formed, 4 ml 1.0 mol/l  $\text{NH}_4\text{F}$  solution was dropwisely added. After vigorous stirring at room temperature for 30 min, the colloidal solution was transferred into a 30 ml teflon-lined autoclave, sealed and heated at 180 °C for 8 h. The system was allowed to cool naturally to room

temperature, and the products were deposited at the bottom of the vessel. The precipitates were separated by centrifugation, washed with water and ethanol for several times and dried at 140 °C for 1 h. The final product was obtained after calcination of the precipitates at 400 °C for 1 h.

0.5 mol% Tm<sup>3+</sup> doped samples were prepared by the same procedure, except for changing the 2 mol% Er<sup>3+</sup> to 0.5 mol% Tm<sup>3+</sup>.

Samples of YF<sub>3</sub>: Yb<sub>0.20</sub>Er<sub>0.02</sub> and CaF<sub>2</sub>: Yb<sub>0.20</sub>Er<sub>0.02</sub> were also synthesized by the similar procedure.

**Figure S1-S14:**

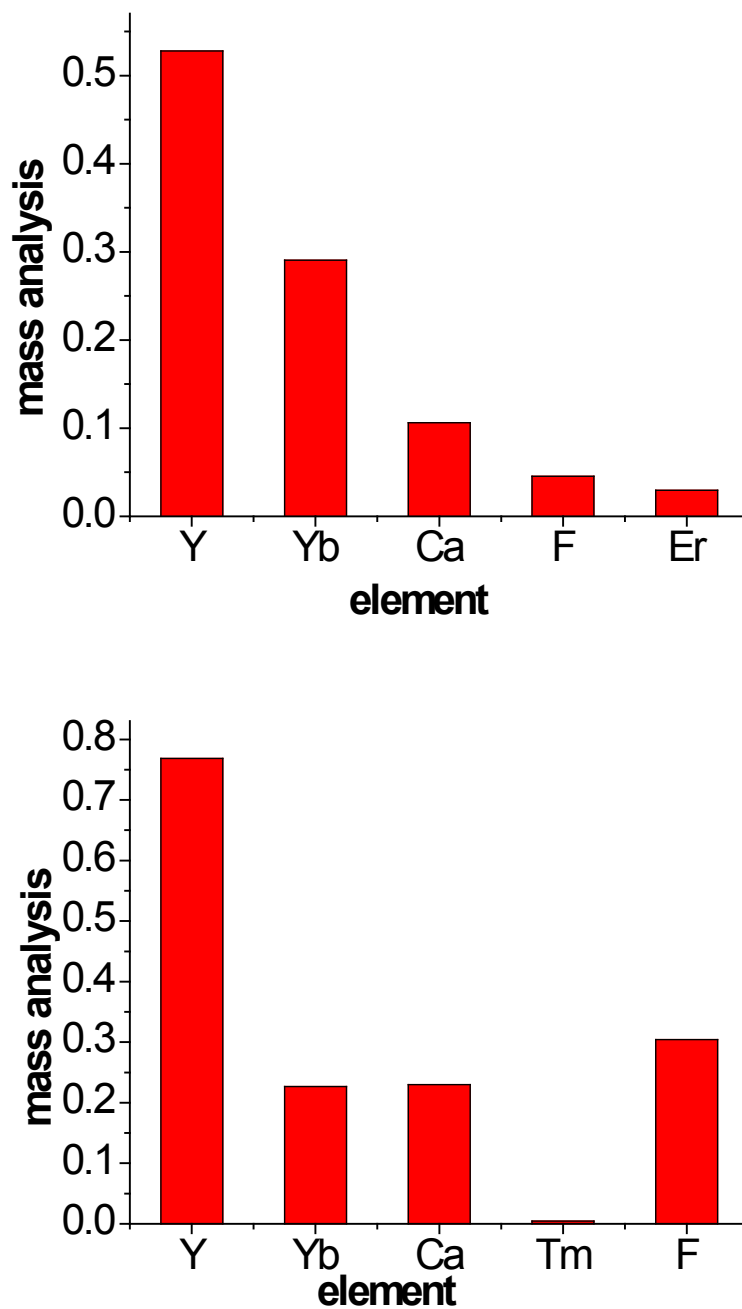

**Figure S1.** The XRF data for  $\text{Ca}_{0.34}\text{Y}_{0.76}\text{Yb}_{0.22}\text{Er}_{0.02}\text{F}_{3.68}$  and  $\text{Ca}_{0.23}\text{Y}_{0.769}\text{Yb}_{0.226}\text{Tm}_{0.005}\text{F}_{3.46}$  respectively

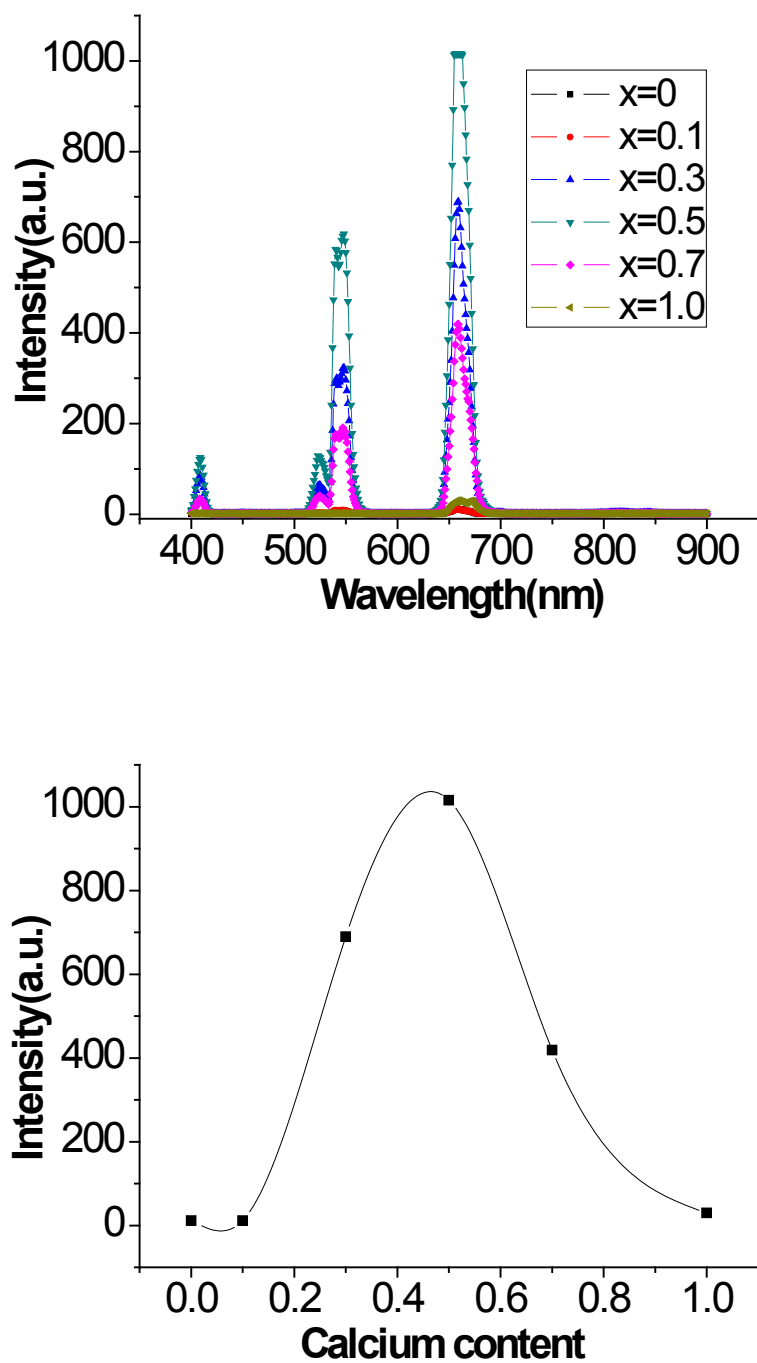

**Figure S2.** UC luminescence spectra (top) and the luminescent intensities of  $\text{Ca}_x\text{Y}_{0.76}\text{Yb}_{0.22}\text{Er}_{0.02}\text{F}_{3+2x}$  with the different designed x values (down).

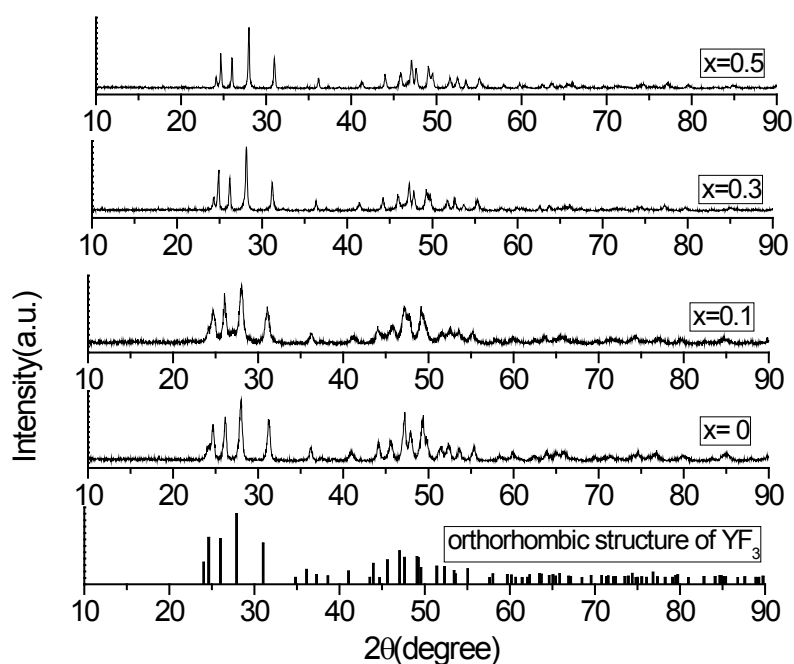

**Figure S3.** The XRD patterns of  $\text{Ca}_x\text{Y}_{0.76}\text{Yb}_{0.22}\text{Er}_{0.02}\text{F}_{3+2x}$  microcrystals with the designed x values of 0, 0.1, 0.3, 0.5 respectively

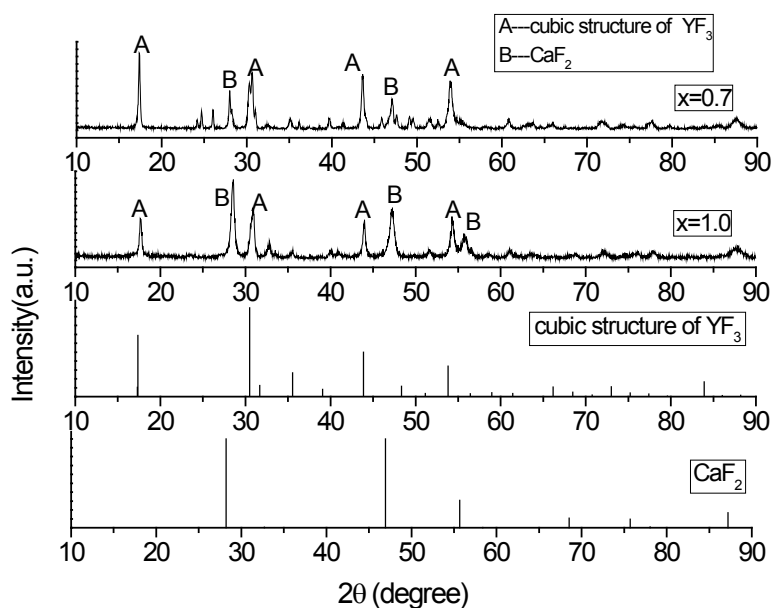

**Figure S4.** The XRD patterns of  $\text{Ca}_x\text{Y}_{0.76}\text{Yb}_{0.22}\text{Er}_{0.02}\text{F}_{3+2x}$  microcrystals with the designed x values of 0.7, 1.0 respectively

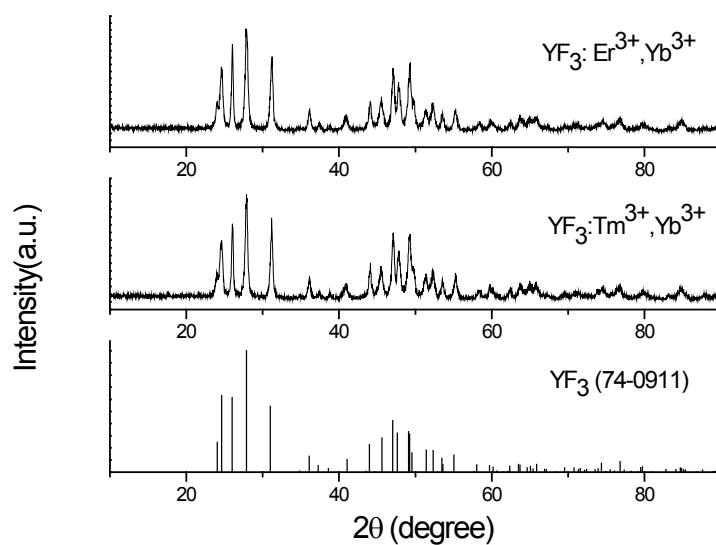

**Figure S5.** The XRD patterns for  $\text{YF}_3:\text{Yb}_{0.20}\text{Er}_{0.02}$  and  $\text{YF}_3:\text{Yb}_{0.20}\text{Tm}_{0.005}$  microcrystals respectively

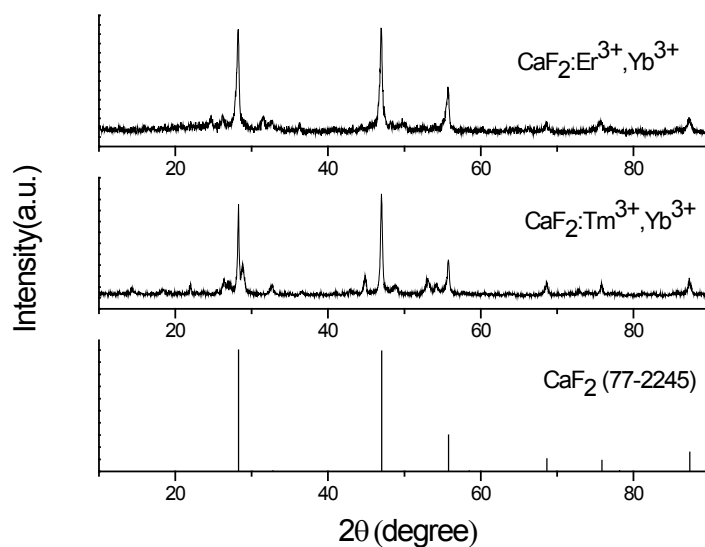

**Figure S6.** The XRD patterns for  $\text{CaF}_2:\text{Yb}_{0.20}\text{Er}_{0.02}$  and  $\text{CaF}_2:\text{Yb}_{0.20}\text{Tm}_{0.005}$  microcrystals respectively

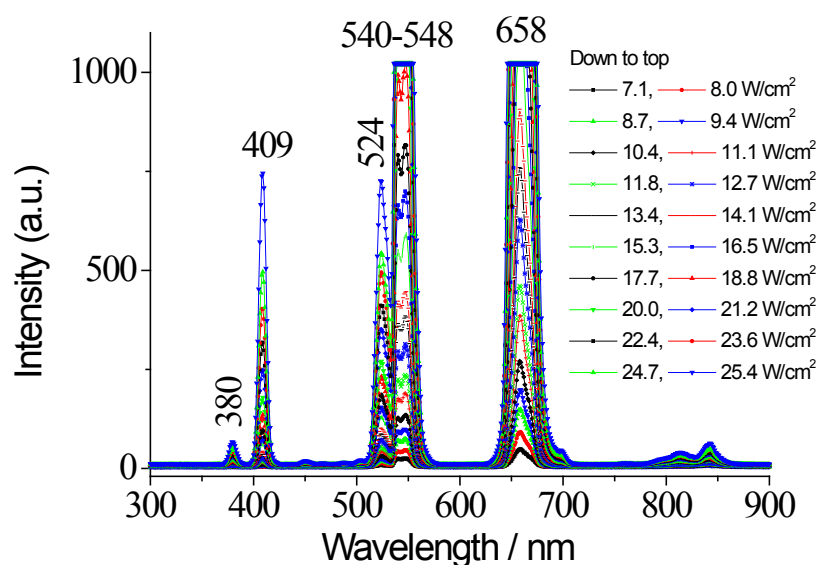

**Figure S7.** UC emission spectra of  $\text{Ca}_{0.34}\text{Y}_{0.76}\text{Yb}_{0.22}\text{Er}_{0.02}\text{F}_{3.68}$  under different excitation power density ( $7.1 \sim 25.4 \text{ W}\cdot\text{cm}^{-2}$ ).

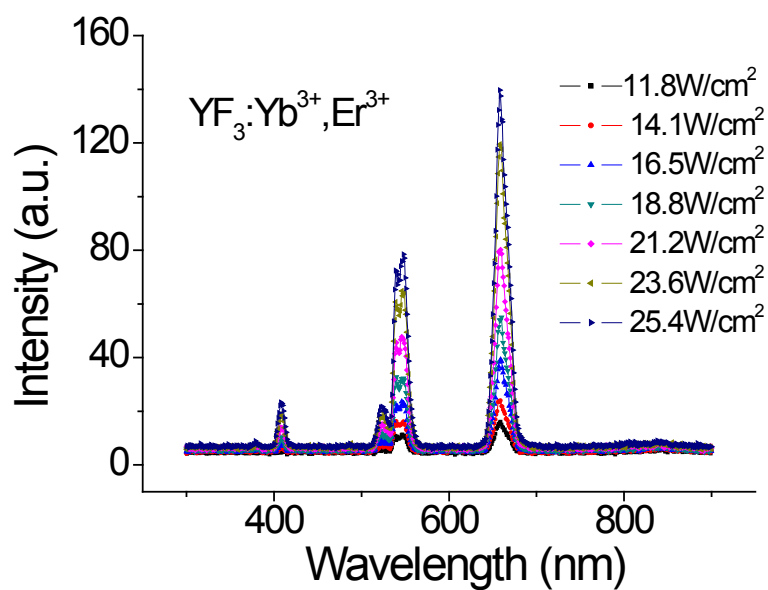

**Figure S8.** UC emission spectra of  $\text{YF}_3:\text{Yb}_{0.20}\text{Er}_{0.02}$  under different excitation power density ( $11.8 \sim 25.4 \text{ W}\cdot\text{cm}^{-2}$ ).

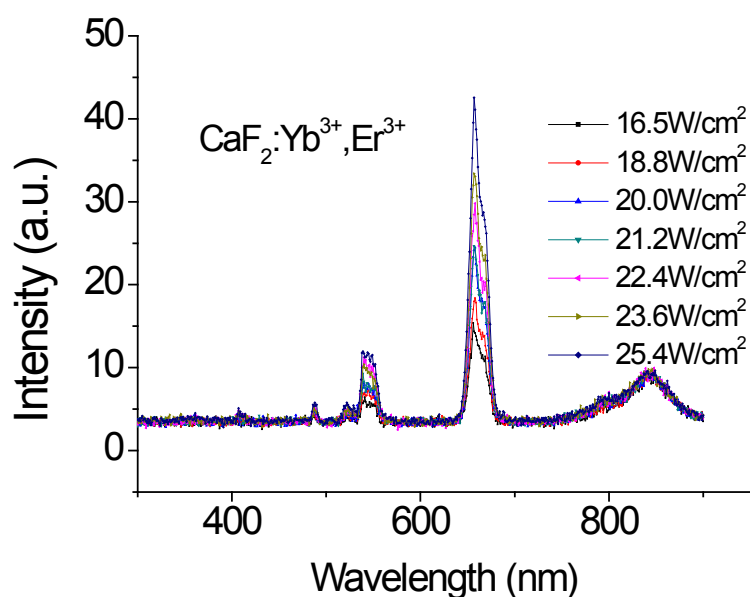

**Figure S9.** UC emission spectra of  $\text{CaF}_2:\text{Yb}_{0.20}\text{Er}_{0.02}$  under different excitation power density ( $16.5 \sim 25.4 \text{ W}\cdot\text{cm}^{-2}$ ).

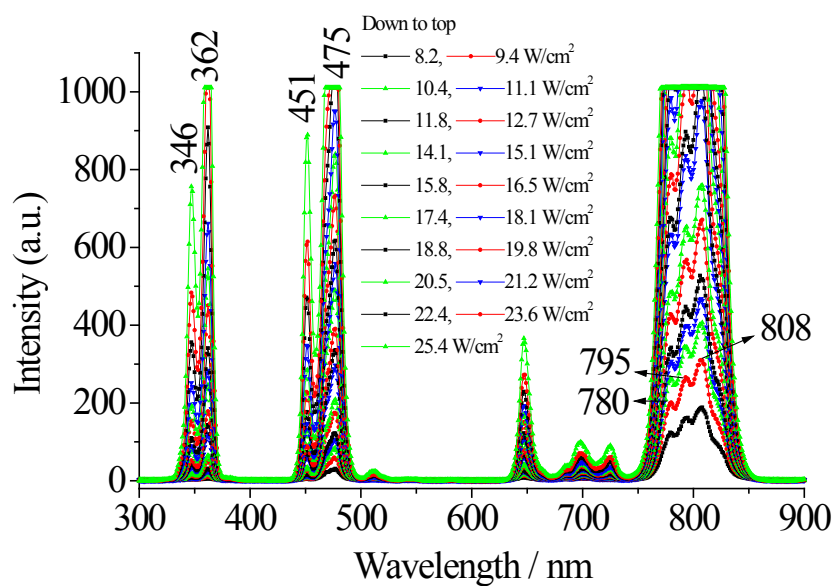

**Figure S10.** UC emission spectra of  $\text{Ca}_{0.236}\text{Y}_{0.769}\text{Yb}_{0.226}\text{Tm}_{0.005}\text{F}_{3.472}$  under different excitation power density ( $8.2 \sim 25.4 \text{ W}\cdot\text{cm}^{-2}$ ).



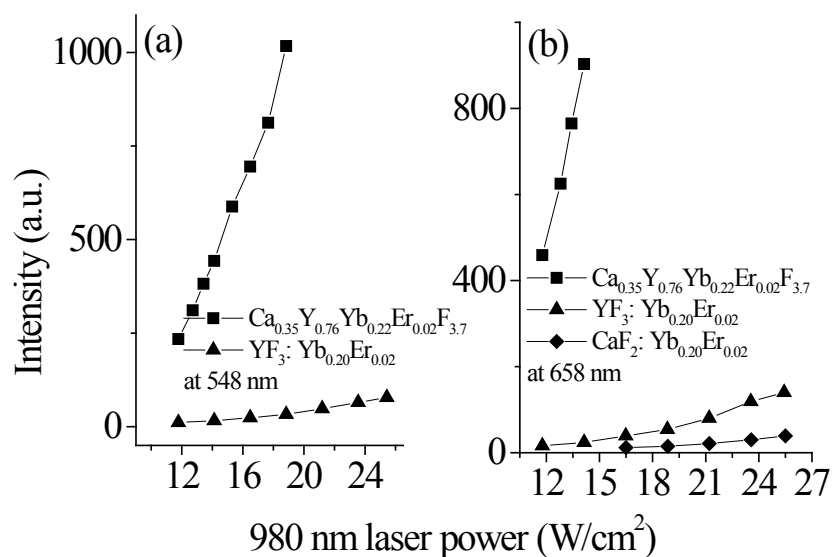

**Figure S11.** The relative UC emission intensities for Ca<sub>0.35</sub>Y<sub>0.76</sub>Yb<sub>0.22</sub>Er<sub>0.02</sub>F<sub>3.7</sub>, YF<sub>3</sub>:Yb<sub>0.20</sub>Er<sub>0.02</sub> and CaF<sub>2</sub>:Yb<sub>0.20</sub>Er<sub>0.02</sub> at 548 nm and 658 nm respectively

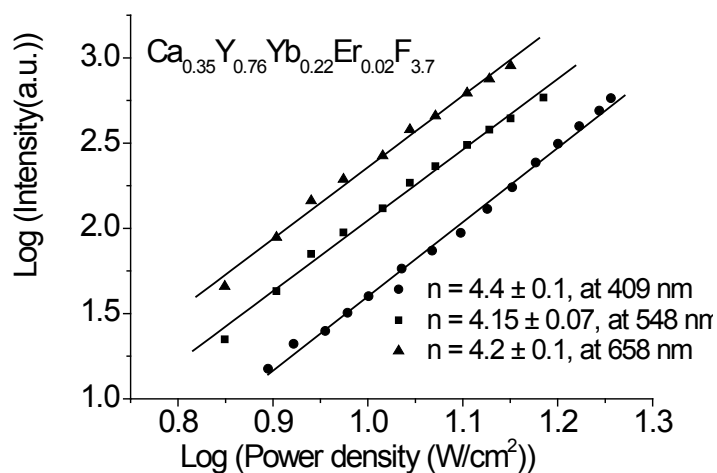

**Figure S12.** The Log-Log curves of the UC emission intensities versus the excitation power density for Ca<sub>0.35</sub>Y<sub>0.76</sub>Yb<sub>0.22</sub>Er<sub>0.02</sub>F<sub>3.7</sub>

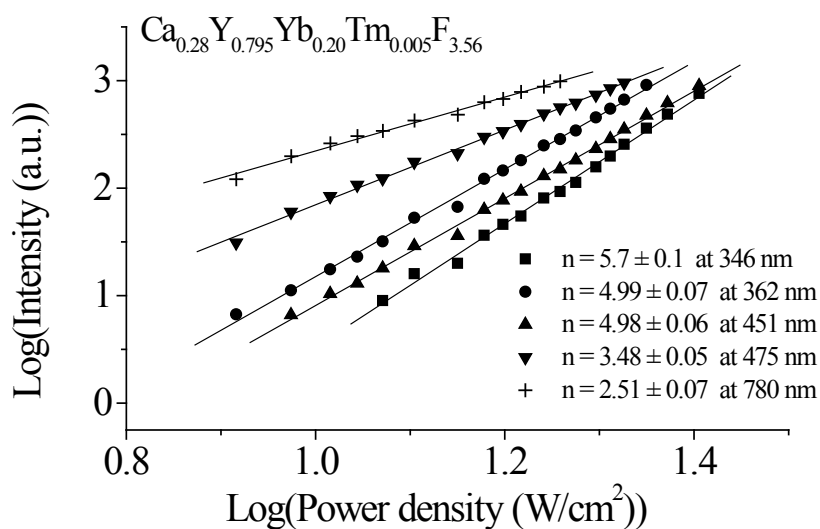

**Figure S13.** The Log-Log curves of the UC emission intensities versus the excitation power density for  $\text{Ca}_{0.236}\text{Y}_{0.769}\text{Yb}_{0.226}\text{Tm}_{0.005}\text{F}_{3.472}$

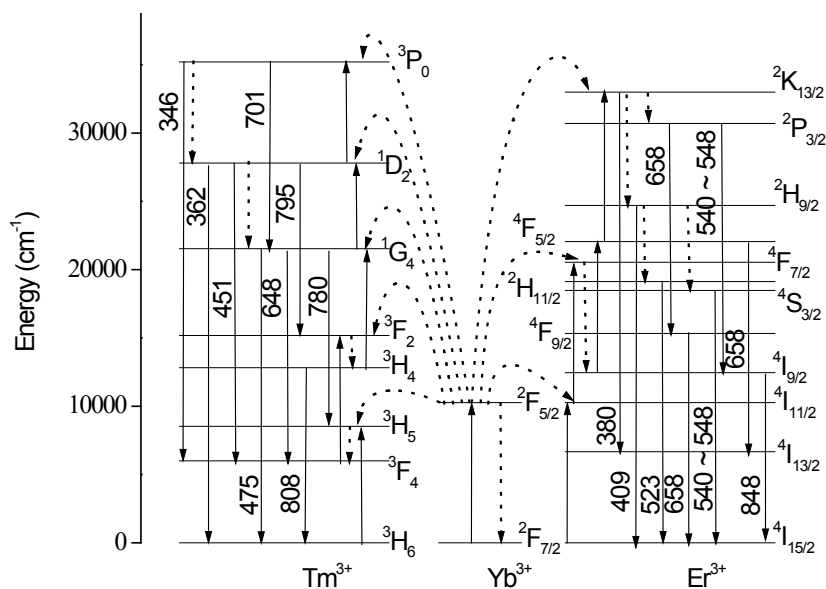

**Figure S14.** UC excitation and emission schemes for the  $\text{Yb}^{3+}$ -sensitized  $\text{Er}^{3+}$  and  $\text{Tm}^{3+}$  microcrystals,
